# Supplementary material for: Structural and biochemical insights into human zinc finger protein AEBP2 reveals interactions with RBBP4
Source: PubMed Central journal article supplement (PMC6053351; doi:10.1007/s13238-017-0483-6), 2017-11-13
Supplement: 13238_2017_483_MOESM1_ESM.pdf [file 13238_2017_483_MOESM1_ESM.pdf]

# Structural and Biochemical Insights into Human Zinc Finger Protein

## AEBP2 Reveals Interactions with RBBP4

**KEY WORDS:** AEBP2, Cys2His2 zinc finger, RBBP4, PRC2.

Aiai Sun<sup>1</sup>, Fudong Li<sup>1</sup>, Zhonghua Liu<sup>1</sup>, Yiyang Jiang<sup>1</sup>, Jiahai Zhang<sup>1</sup>, Jihui Wu<sup>1\*</sup>, Yunyu Shi<sup>1\*</sup>

<sup>1</sup> Hefei National Laboratory for Physical Sciences at Microscale and School of Life Sciences, University of Science and Technology of China, Hefei, Anhui 230027, China

\* Correspondence: [yyshi@ustc.edu.cn](mailto:yyshi@ustc.edu.cn) ( Yunyu Shi); [wujihui@ustc.edu.cn](mailto:wujihui@ustc.edu.cn) ( Jihui Wu).

### SUPPLEMENTARY FIGURES

**Figure S1. Sequence alignment of orthologs of AEBP2 (Residues Asn258 - Asp396) protein from diverse vertebrate species.** The cysteines and histidines coordinating zinc ions are marked with stars. The residues corresponding to DNA binding zinc fingers involved in DNA interaction are marked with triangles. The RRR rich motif are highlighted with yellow background, with crucial residues contributing to RBBP4 recognition marked with red circles.

**Figure S2. NOE columns showing inter-zinc finger interactions between ZF1 and ZF2.** *A*, Representative <sup>1</sup>H-<sup>1</sup>H spectral columns from 3D <sup>15</sup>N-NOESY spectrum for loop regions. Inter-zinc finger peaks are labeled in red, with intra-zinc fingers in black. *B*, Representative <sup>1</sup>H-<sup>1</sup>H spectral columns from 3D <sup>13</sup>C-NOESY spectrum for helix regions. Inter-zinc finger peaks are labeled in red, with intra-zinc fingers in black.

**Figure S3. AEBP2 ZF1-3 shows no binding affinity for tested dsDNA and tested G quadruplex.** Tzap zinc finger protein was used as a positive control and tested with GC-rich (magenta circle), AT-rich (cyan circle) and T1 (gray circle) dsDNA, respectively. AEBP2 ZF1-3 was tested with GC-rich (red diamond), AT-rich (blue diamond) and T1 (brown diamond) dsDNA and G3A4 (purple diamond), respectively. ND means no detected.

**Figure S4. Comparison between TFIIIA zinc fingers (PDB ID: 1TF3) and AEBP2 ZF1-3.** *A*, Sequence alignment of AEBP2 zinc fingers. The residues coordinating zinc ions are shown in red and marked with red star. Residues corresponding to DNA binding zinc fingers involved in DNA interaction are labeled with number 6, 3, 2, -1 and marked with black square. *B*, Representation of TFIIIA zinc fingers. Upward is the cartoon view with residues on -1, +2, +3, +6 shown in sticks. Downward is the electrostatic surface with DNA shown in cartoon. color scheme as for Figure 1. *C*, Representation of AEBP2 ZF1-3. Upward is the cartoon view with residues on -1, +2, +3, +6 shown in sticks. Downward is the electrostatic surface potential representation.

**Figure S5. Arg380 and Lys382 are crucial for AEBP2 RRK motif bound to RBBP4.** *A*, ITC assays for determining the crucial residues between RBBP4 and AEBP2<sub>379-390</sub> peptide mutants. Data were fitted to a one-site binding model using Origin 7. *B*, Sequence alignment of AEBP2. Representative sequences of the corresponding FOG1, PHF6, and histone H3 motifs are aligned with AEBP2<sub>379-390</sub>. The residues crucial for binding affinity are shown in red. *C*, Comparison of AEBP2<sub>379-390</sub> peptide binding properties of RBBP4 with other reported complex structures. The FOG-1 ( PDB ID: 2XU7 ), PHF6 ( PDB ID: 4R7A ), H3 ( PDB ID: 2YBA ) and AEBP2 are shown as magenta, cyan, blue and yellow, respectively, with relative RBBP4 or Nurf55 shown as violet, light cyan, green and gray, respectively.

**Figure S6. Coomassie staining of SDS-PAGE gel for gel-filtration assays corresponding to Figure 2E.**

Figure S1.

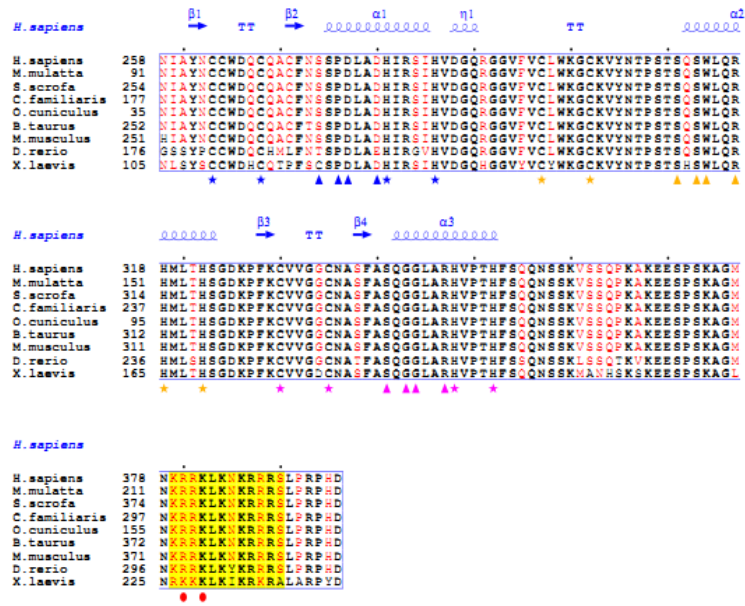

Figure S2.

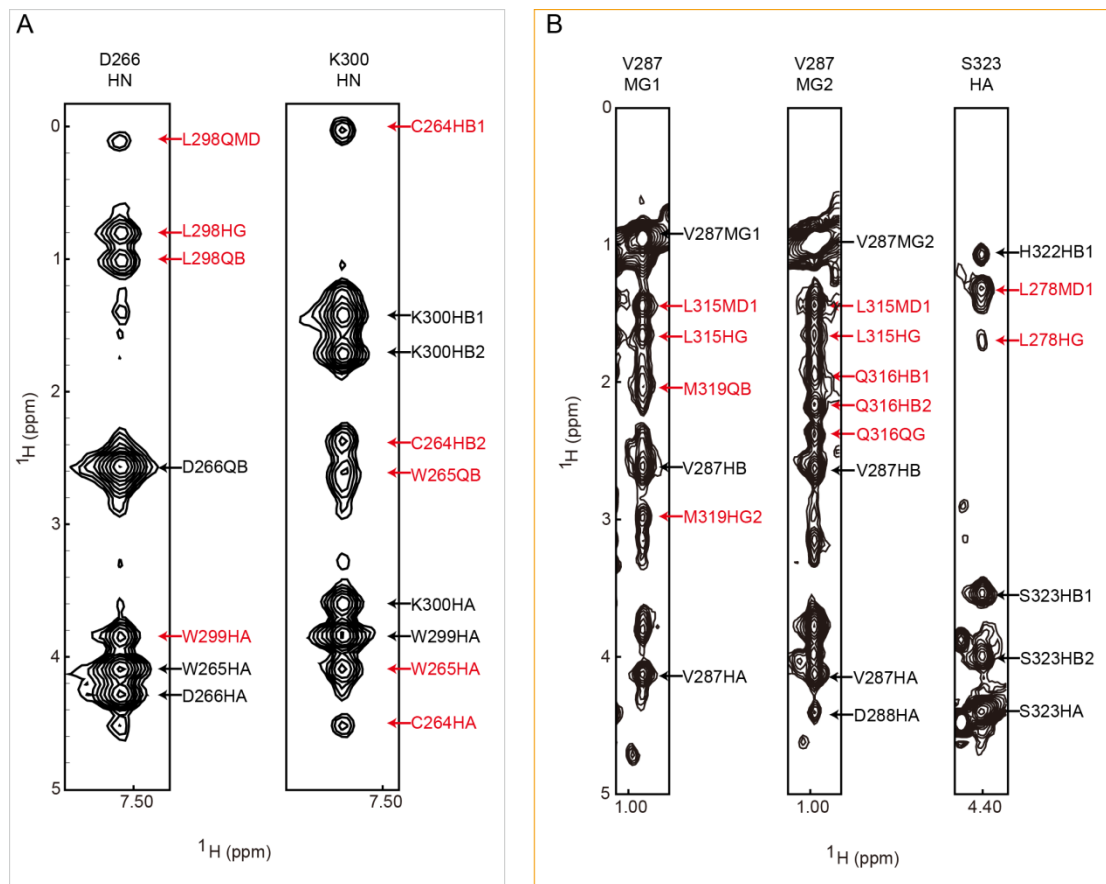

Figure S3.

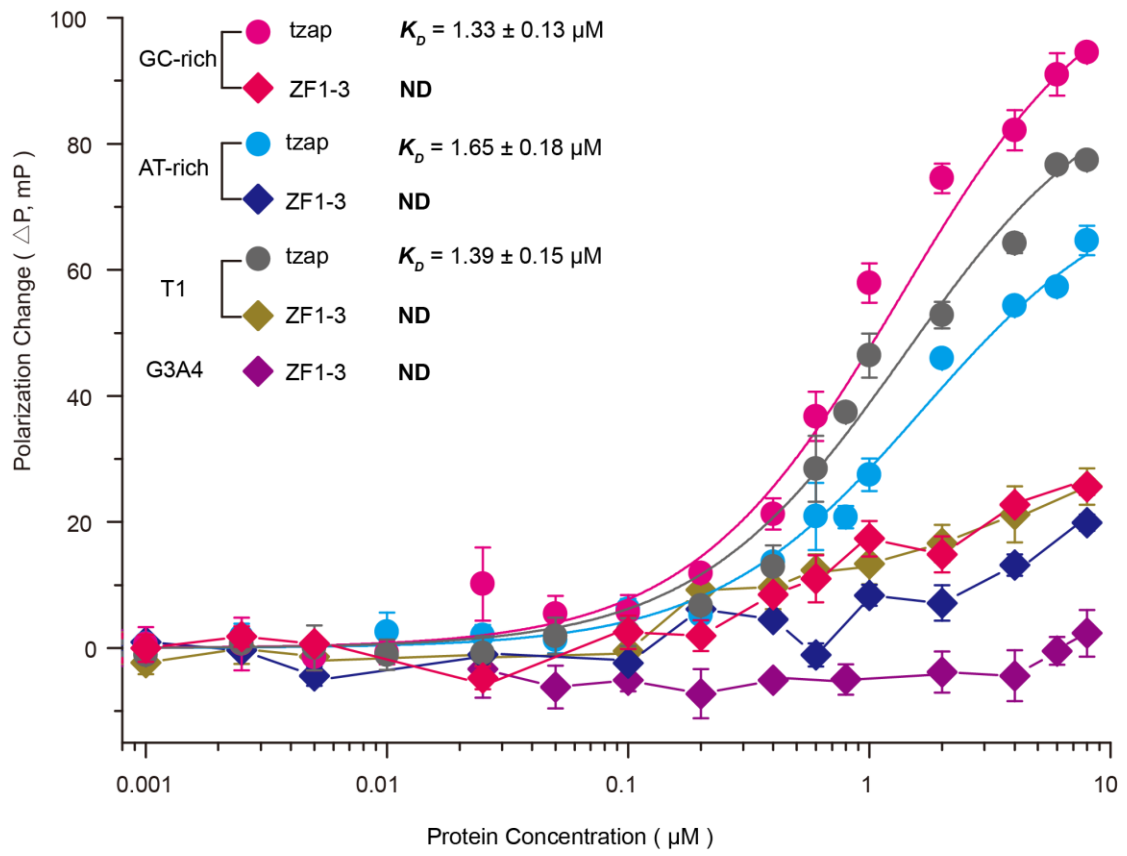



**Figure S5.**

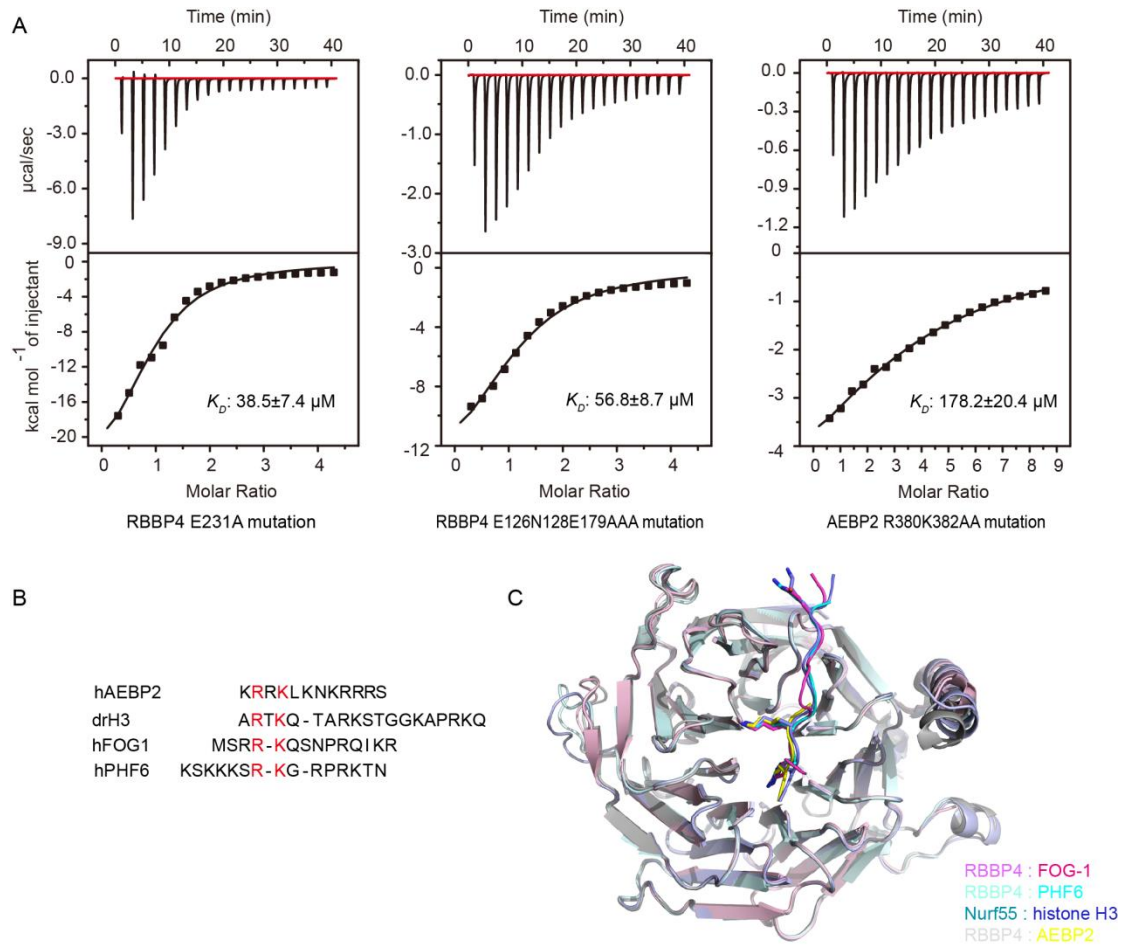

**Figure S6.**

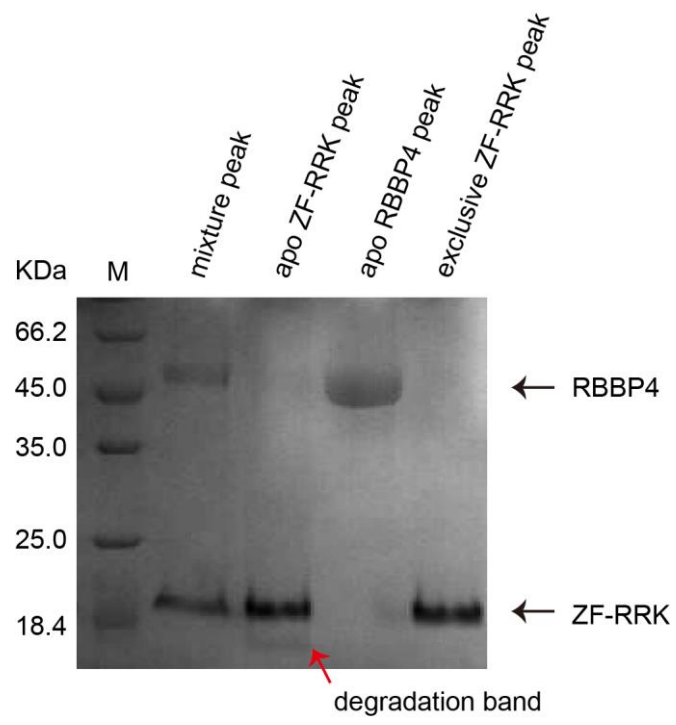



## SUPPLEMENTARY TABLEs

**Table S1. Structure calculation statistics of AEBP2 ZF1-3**

---

| <b>Number of restraints (CYANA upper limits)</b>  |                   |
|---------------------------------------------------|-------------------|
| intra-residue [i = j]                             | 353               |
| sequential [ i - j  = 1]                          | 472               |
| medium range [1 <  i - j  < 5]                    | 377               |
| long range [ i - j  ≥ 5]                          | 430               |
| Total NOE                                         | 1635              |
| Dihedrals                                         | 129               |
| Zinc coordination restraints                      | 54                |
| <b>Mean rmsd from Idealized Covalent Geometry</b> |                   |
| bonds ( Å )                                       | 0.01204 ± 0.00032 |
| angles ( degrees )                                | 1.27459 ± 0.04300 |
| improper ( degrees )                              | 1.43641 ± 0.09455 |
| <b>Mean rmsd from Experiment Restraints</b>       |                   |
| distance ( Å )                                    | 0.01985 ± 0.00116 |
| Cdih ( degrees )                                  | 0.57365 ± 0.12224 |
| <b>RMSD (Å)</b>                                   |                   |
| all bb / heavy                                    | 3.0/3.4           |
| 261-352 bb / heavy                                | 0.602/0.954       |
| 261-286 bb / heavy                                | 0.352/0.905       |
| 295-322 bb / heavy                                | 0.313/0.749       |
| 328-352 bb / heavy                                | 0.285/0.741       |
| <b>Ramachandran (%)*</b>                          |                   |
| Favourable                                        | 88.6              |
| Additional allowed                                | 11.4              |
| Generously                                        | 0                 |
| Disallowed                                        | 0                 |

---

\*Calculated using nonglycine and nonproline residues 261-265, 268-324, 327-353 with the program PROCHECK-NMR to assess the quality of the structure.

**Table S2. The observed inter-finger NOE between ZF1 and ZF2.**

| ZF1     |      | ZF2     |      | ZF1     |      | ZF2     |      |
|---------|------|---------|------|---------|------|---------|------|
| Residue | Atom | Residue | Atom | Residue | Atom | Residue | Atom |
| W265    | HA   | W299    | HA   | D266    | QB   | L298    | HA   |
| W265    | HN   | W299    | HA   | D266    | QB   | L298    | HG   |
| W265    | HN   | W299    | HD1  | D266    | QB   | L298    | QMG  |
| D266    | HA   | K300    | QD   | W265    | HA   | W299    | HA   |
| D266    | QB   | L298    | QMD  | W265    | HA   | W299    | HN   |
| D266    | HN   | L298    | QMD  | D266    | HA   | K300    | QD   |
| D266    | HN   | L298    | HG   | D266    | HA   | K300    | QE   |
| D266    | HN   | L298    | QB   | C264    | HB1  | K300    | HN   |
| D266    | HN   | W299    | HA   | C264    | HB2  | K300    | HN   |
| L278    | MD1  | S323    | HB2  | W265    | QB   | K300    | HN   |
| L278    | MD1  | S323    | HA   | W265    | HA   | K300    | HN   |
| A279    | HA   | H322    | HB1  | C264    | HA   | K300    | HN   |
| A279    | MB   | S323    | HB1  | V287    | MG2  | L315    | MD1  |
| I282    | MD1  | S323    | HB1  | V287    | HA   | L315    | MD1  |
| I282    | MD2  | M319    | HG2  | V287    | QMG  | L315    | MD2  |
| I282    | MG2  | M319    | HA   | V287    | QMG  | Q316    | HA   |
| V287    | HA   | L315    | MD1  | V287    | HB   | Q316    | HA   |
| V287    | HA   | L315    | HG   | V287    | QMG  | Q316    | HE22 |
| V287    | HA   | M319    | HG2  | V287    | QMG  | Q316    | HE21 |
| V287    | MG1  | L315    | MD1  | I282    | MG2  | M319    | HA   |
| V287    | MG1  | L315    | HG   | V287    | MG1  | M319    | HG2  |
| V287    | MG1  | M319    | QB   | V287    | MG1  | M319    | HG1  |
| V287    | MG1  | M319    | HG2  | L278    | MD1  | S323    | HA   |
| V287    | MG2  | L315    | MD1  | L278    | HG   | S323    | HA   |
| V287    | MG2  | L315    | HG   | L278    | MD1  | S323    | HB1  |
| V287    | MG2  | Q316    | HB1  | A279    | MB   | S323    | HB1  |
| V287    | MG2  | Q316    | HB2  | L278    | MD1  | S323    | HB2  |
| V287    | MG2  | Q316    | QG   | A279    | MB   | S323    | HB2  |

**Table S3. Data collection and refinement statistics of AEBP2<sub>379-390</sub> bound to RBBP4.**

| <b>Data collection</b>                                  |                         |
|---------------------------------------------------------|-------------------------|
| Space group                                             | <i>P</i> 2 <sub>1</sub> |
| Cell dimensions                                         |                         |
| a, b, c (Å)                                             | 76.76, 59.45, 102.44    |
| α, β, γ (°)                                             | 90.00, 94.33, 90.00     |
| Wavelength (Å)                                          | 0.9792                  |
| Resolution (Å)                                          | 36.76 -2.15 (2.23-2.15) |
| <i>R</i> <sub>merge</sub> (%)                           | 9.8 (66.1)              |
| <i>I</i> / $\sigma I$                                   | 14.11 (2.19)            |
| Completeness (%)                                        | 99.9 (100.0)            |
| Redundancy                                              | 3.9 (3.7)               |
| <b>Refinement</b>                                       |                         |
| Resolution (Å)                                          | 36.76 -2.15 (2.23-2.15) |
| No. reflections                                         | 50618 (4686)            |
| <i>R</i> <sub>work</sub> / <i>R</i> <sub>free</sub> (%) | 16.90/21.86             |
| No. of atoms                                            | 6590                    |
| Protein                                                 | 6087                    |
| Peptide                                                 | 92                      |
| Water                                                   | 411                     |
| <i>B</i> -factors (Å <sup>2</sup> )                     | 37.76                   |
| Protein                                                 | 37.06                   |
| Peptide                                                 | 65.94                   |
| Water                                                   | 41.78                   |
| R.M.S. deviations                                       |                         |
| Bond length (Å)                                         | 0.007                   |
| Bond angles (°)                                         | 0.92                    |
| Ramachandran values                                     |                         |
| Most favored (%)                                        | 97.4                    |
| Additional allowed (%)                                  | 2.6                     |
| Outliers (%)                                            | 0                       |

\*Values in parentheses are for highest-resolution shell.

## **MATERIALS AND METHODS**

### **AEBP2 protein preparation.**

All clones were amplified by PCR from the human cDNA library and ligated into p28 or pGEX plasmid. Proteins were expressed in *Escherichia coli* BL21(DE3)-Gold (Stratagene) at 16 °C for 24 hours. All proteins were prepared from cells growing in LR medium supplemented with 0.1 mM ZnSO<sub>4</sub>, <sup>15</sup>NH<sub>4</sub>Cl, with or without <sup>13</sup>C<sub>6</sub>-glucose. The proteins were purified using the Ni-chelating Sepharose™ Fast Flow column (GE Healthcare) and then further purified by chromatography on a HiLoad Superdex 200 16/60 column (GE Healthcare).

### **Nuclear magnetic resonance spectroscopy.**

All NMR spectra were collected at 298K on a Bruker DMX600 spectrometer equipped with a cryoprobe. The protein was concentrated to 0.6-0.8 mM in buffer consisting of 25 mM NaH<sub>2</sub>PO<sub>4</sub> (pH 6.3), 100 mM NaCl, and 5 mM DTT with 10% D<sub>2</sub>O. Sequential assignment were conducted from CBCANH, CBCA(CO)NH, CC(CO)NH-TOCSY, HCC(CO)NH-TOCSY in H<sub>2</sub>O and HCCH-COSY, HCCH-TOCSY in D<sub>2</sub>O. NOE distance restraints were obtained from 2D 1H-1H NOESY, 3D <sup>15</sup>N-edited and <sup>13</sup>C-edited NOESY. All spectra were processed using the suite of programs provided in the NMRPipe/NMRDraw software package (Delaglio et al., 1995) and analyzed in Sparky (provided by T. D. Goddard and D. G. Kneller, University of California, San Francisco).

## **NMR structure calculation**

Structure calculation of all three AEBP2 zinc fingers was performed in CYANA using fully automated NOESY assignment (Guntert, 2003). Distance restraints were generated and calibrated automatically by CYANA using 2D <sup>1</sup>H-<sup>1</sup>H NOESY, <sup>15</sup>N- and <sup>13</sup>C-edited NOESY-HSQC peak lists. The restraints for backbone dihedral angles were determined using TALOS+ (Shen et al., 2009). Additional restraints were introduced for distances between the zinc ion and zinc-coordinating atoms to enforce tetrahedral geometry of the zinc center. The structure was recalculated by CNS software (Brunger et al., 1998) and 20 lowest-energy conformers were selected. The quality of the ensemble of 20 lowest energy structures was assessed using PROCHECK-NMR (Laskowski et al., 1996) and Protein Structure Validation Server (PSVS) (Bhattacharya et al., 2007). NMR calculation and refinement data are displayed in Table 1. The structure figures were prepared with MOLMOL (Koradi et al., 1996) and PyMOL (DeLano, 2002) (DeLano Scientific San Carlos, California USA).

## **Fluorescence Polarization Assays (FPA)**

The dsDNA segments used for fluorescence polarization assays included T1 (5' GATCTTTAGTTAACTTCCTCTCTGTCTGCAGGCCACTCCAGATC 3'), AT-rich (5' ATAATTTATATTTATTATTTTATTATAATTTATATAATTTATAT 3'), GC-rich (5' GCGGCCCGCGCCCGCCGCCCGCCCGCGGCCCGCGCGGCCCGCGC 3'), and G3A4 (5' AAAAAAGGGAAAAGGGAAAAGGGAAAAGGGAAAAAAAAAAA 3') and were synthesized with the sense chain labeled (5'-FAM) (Carboxyfluorescein) by

Takara Bio Inc. (Dalian, China). Two stands of complementary 44-nt single-stranded DNA were annealed to form dsDNA: T1, GC-rich, and AT-rich, respectively. The assays of T1, GC-rich and AT-rich were performed in buffer (25 mM Tris, pH 7.4, 150 mM NaCl) at 20 °C using a SpectraMax M5 Microplate Reader system (Molecular Devices). G3A4 was dissolved and the assay of G3A4 was performed in buffer (25mM Tris, pH 7.4, 150mM KCl) for the formation of G quadruplex. The wavelengths of fluorescence excitation and emission were 490 nM and 525 nM, respectively. Each 96-well plate contained 50 nM of fluorescently labeled (5' -FAM) DNA probe and different amounts of AEBP2 ZF1-3 with a final volume of 200 µl. The data were further analyzed using Origin9, as previously described (Liu et al., 2014).

#### **RBBP4 protein preparation.**

The gene encoding full-length human RBBP4 (residues 1–425; UniProt accession number Q09028) was cloned between the EcoR I and Xba I sites of a pFastBac™ HT B vector. The pFastBac™ HT B construct was expressed in High Five insect cells infected with baculovirus utilizing the Bac-to-Bac system (Invitrogen) according to the manufacturer's instructions. The cells were harvested and resuspended in lysis buffer (25 mM Tris, 500 mM NaCl, pH 8.0). Cells were lysed by sonication and clarified by ultracentrifugation. The protein was purified with Ni-chelating Sepharose™ Fast Flow column (GE Healthcare) and further purified by chromatography on a HiLoad Superdex 200 16/60 column (GE Healthcare). The

protein was then concentrated up to 10 mg/ml in buffer consisting of 25 mM Tris (pH 7.4), 150 mM NaCl for further experiments.

### **AEBP2 peptide synthesis.**

Wild-type AEBP2 (residues 379-390) and mutant peptides used here were chemically synthesized and purified (to 95% purity) by GL Biochem (Shanghai, China).

### **Isothermal Titration Calorimetry (ITC) Experiments.**

ITC measurements were carried out at 25 °C using a MicroCal iTC200 titration calorimeter (GE Healthcare). RBBP4 and AEBP2 peptides were dissolved separately in ITC buffer (25 mM Tris, pH 7.4, 150 mM NaCl). The AEBP2 peptides were injected into RBBP4 at time intervals of two minutes between each 2 µl injection (20 injections in total). The data were analyzed using one-site binding model via the MicroCal Origin 7.0 software package (provided by the manufacturer).

### **Crystallization and Structure Determination.**

Concentrated RBBP4 protein (10 mg/ml) was incubated overnight at 4 °C with AEBP2<sub>379-390</sub> peptide at a molar ratio of 1:2. Additionally, 1 µl RBBP4-AEBP2 complex drops were mixed with 1 µl of crystallization solution using the sitting drop vapor diffusion method. Single crystals were obtained at 8-12 °C for a week in 0.2 M Ammonium sulfate; 0.1 M MES monohydrate pH 6.5; 30% w/v Polyethylene glycol monomethyl ether 5,000 (HAMPTON RESEARCH). Crystals were harvested,

soaked in mother liquor supplemented with 30% glycerol and then flash frozen in liquid nitrogen. X-ray diffraction data were collected on beamline 17U1 at the Shanghai Synchrotron Radiation Facility (SSRF). The initial data were processed using HKL2000 (Battye et al., 2011). The structure was then solved by molecular replacement using RBBP4 (PDB ID: 3GFC) (Xu and Min, 2011) as a search model via MOLREP (Vagin and Teplyakov, 2010). The model was further built and refined using Coot (Emsley et al., 2010), Refmac (Murshudov et al., 2011) and Phenix (Afonine et al., 2012). Crystal diffraction data and refinement statistics are displayed in Table 2.

### **Gel Filtration Assay**

RBBP4 and AEBP2 ZF-RRK were concentrated in buffer (25 mM Tris, pH 7.4, 150 mM NaCl) and mixed with molar ratio of 1 : 2.5. The mixture, apo RBBP4, apo AEBP2 ZF-RRK were conducted on a same Superdex<sup>TM</sup> 200 10/300 GL column, respectively.

### **Coordinates**

Coordinates, chemical shifts and peaks of AEBP2 three zinc fingers have been deposited in the Protein Data Bank (PDB) under the accession code 5Y0U, corresponding to the Biological Magnetic Resonance Bank (BMRB) under the accession code 36108. Coordinates and structure factors of RBBP4 bound to the AEBP2<sub>379-390</sub> peptide complex have been deposited in PDB under the accession code



5Y1U.

## REFERENCES

- Afonine, P.V., Grosse-Kunstleve, R.W., Echols, N., Headd, J.J., Moriarty, N.W., Mustyakimov, M., Terwilliger, T.C., Urzhumtsev, A., Zwart, P.H., and Adams, P.D. (2012). Towards automated crystallographic structure refinement with phenix.refine. *Acta crystallographica Section D, Biological crystallography* 68, 352-367.
- Battye, T.G., Kontogiannis, L., Johnson, O., Powell, H.R., and Leslie, A.G. (2011). iMOSFLM: a new graphical interface for diffraction-image processing with MOSFLM. *Acta crystallographica Section D, Biological crystallography* 67, 271-281.
- Bhattacharya, A., Tejero, R., and Montelione, G.T. (2007). Evaluating protein structures determined by structural genomics consortia. *Proteins* 66, 778-795.
- Brunger, A.T., Adams, P.D., Clore, G.M., DeLano, W.L., Gros, P., Grosse-Kunstleve, R.W., Jiang, J.S., Kuszewski, J., Nilges, M., Pannu, N.S., *et al.* (1998). Crystallography & NMR system: A new software suite for macromolecular structure determination. *Acta crystallographica Section D, Biological crystallography* 54, 905-921.
- Delaglio, F., Grzesiek, S., Vuister, G.W., Zhu, G., Pfeifer, J., and Bax, A. (1995). Nmrpipe - a Multidimensional Spectral Processing System Based on Unix Pipes. *Journal Of Biomolecular Nmr* 6, 277-293.
- DeLano, W.L. (2002). PyMOL: An Open-Source Molecular Graphics Tool. DeLano Scientific San Carlos, California USA.

Emsley, P., Lohkamp, B., Scott, W.G., and Cowtan, K. (2010). Features and development of Coot. *Acta crystallographica Section D, Biological crystallography* 66, 486-501.

Guntert, P. (2003). Automated NMR protein structure calculation. *Progress In Nuclear Magnetic Resonance Spectroscopy* 43, 105-125.

Koradi, R., Billeter, M., and Wuthrich, K. (1996). MOLMOL: a program for display and analysis of macromolecular structures. *Journal of molecular graphics* 14, 51-55, 29-32.

Laskowski, R.A., Rullmann, J.A., MacArthur, M.W., Kaptein, R., and Thornton, J.M. (1996). AQUA and PROCHECK-NMR: programs for checking the quality of protein structures solved by NMR. *J Biomol NMR* 8, 477-486.

Liu, Z., Li, F., Ruan, K., Zhang, J., Mei, Y., Wu, J., and Shi, Y. (2014). Structural and functional insights into the human Borjeson-Forssman-Lehmann syndrome-associated protein PHF6. *The Journal of biological chemistry* 289, 10069-10083.

Murshudov, G.N., Skubak, P., Lebedev, A.A., Pannu, N.S., Steiner, R.A., Nicholls, R.A., Winn, M.D., Long, F., and Vagin, A.A. (2011). REFMAC5 for the refinement of macromolecular crystal structures. *Acta crystallographica Section D, Biological crystallography* 67, 355-367.

Shen, Y., Delaglio, F., Cornilescu, G., and Bax, A. (2009). TALOS+: a hybrid method for predicting protein backbone torsion angles from NMR chemical shifts. *J Biomol NMR* 44, 213-223.

Vagin, A., and Teplyakov, A. (2010). Molecular replacement with MOLREP. *Acta*

crystallographica Section D, Biological crystallography 66, 22-25.

Xu, C., and Min, J. (2011). Structure and function of WD40 domain proteins. *Protein & cell* 2, 202-214.
